# Supplementary material
Source: PubMed Central journal article supplement (PMC2832958)
Supplement: supp_M109.063388_jbc.M109.063388-1.pdf [file supp_M109.063388_jbc.M109.063388-1.pdf]

MDITVKEEDFSNGLIKNSSAFENLKFSNIKN-FKVQKRQILYVILFIFVTGGFFFLIGNFFFTPNYKVNIVQNTTEHLTIGFKIERPHDKVLKTIKEK  
 10 20 30 40 50 60 70 80 90 100

Pgal PM -----MKFFKTP-----EYLTIAVKIERSQEKVLKTLINK 30  
 Pviv PM MDIAVKEQDYSNGLIKNSSAFENLKFSNIKN-FKVQKRQILYVILFVFTGIFFFFLISTYFFTPNYKVNKIVQNTTEHLTLAFKIERPYDKVLKTISSK 99  
 Pova PM MDITVKDQDFSNGLIKNSSAFENIKFSNIKN-IKVQKRQQLLYFILFIFITGLFFFFIIGSYFFTPSYNVYQVQNTTEHLTIPFKIVKPHDKKIIKSIYNK 99  
 Pmal PM MDITVKEQEFNSNGLIKNSSAFENIKFSNIKNNFVKVQKQFQILYFILFIFVTGVFFFFLIGNYFFSPNYKVNKIVQNTTEHLTIGFKIERPHDKVLKTIVEK 100  
 PfPM4 MALTYKEEEFSNTLIKNASAFDRKLKLNKN-LKIQKKLQFLYLILFVLTITGVFFFFLIGNFYSHR--KLYQVINKTKHTTIGFKIDRPHDKVLSVLKN 97  
 PfPM1 MALSIK-EDFSSAFAKNESAVNSSTFNMMKTWKIQKRQILYVFFLLITGALFYLDNVLPKNNKINEIMNTSKHVIIGFSIENSHDRIMKTVKQH 99  
 PfPM2 MDITVREHDFKHGFIKSNSTFDGLNIDNSKNKKKIQKGFQILYVLLFCSVMCGLFYVYVENVWLQRDNEMNEILKNSEHLTIGFKVENAHRILKTIKTH 100  
 PfHAP MNLTIKEEDFTNTFMKNEESFNTFRVTKVKR-WNAKRLFKILFVTVIVLAGGSYIFENFVQKNRKINHIKTSKYSTVGFNIENSYDRMLKTIKEH 99

KLKNYIKESVKFFKSGYTKQNYLGSNDVIELDDVANVMFYGEVEVDNKKQKFMFIFDTGSANLWVPSKCKNSIGCSTKNLYDSSKSKTYEKDGTKEIT  
 110 120 130 140 150 160 170 180 190 200

Pgal PM KLKNYIKETFKFLNSGYLTENYLGNDVSYELDEVSVMFYGEAEVGGDKQKFTFIFDTGSANLWVPSKCKSSKGTCKHIYDSSKSKTIEEDGEKAEIT 130  
 Pviv PM NLKNYIKETFNFFKSGYMKQNYLGSNDVIELDDVANVMFYGEVEVDNKKQKFMFIFDTGSANLWVPSKCKNSIGCSTKNLYDSSKSKSYEKDGTKEIT 199  
 Pova PM NLKNYIKETYNLFSKYVQSYLGSNDVIELDEIANLVFYGEVEVDNKKQKFMFIFDTGSANLWVPSKCKSSACKNKNLYDSSKSKTYEKDGTVEILL 199  
 Pmal PM NLKNYIKETVKFFQSGYVQNYLGSNDVIELDDVANVMFYGEVEVDNKKQKFMFIFDTGSANLWVPSKCKNSIGCSTKHLVDASASKSYEKDGTKEIT 200  
 PfPM4 KLSTYVKESEFKFFKSGYAKQGYLGSNDVIELDDVANVMFYGEGQIGTNKQPFMFIFDTGSANLWVPSVNCDSIGCSTKHLVDASASKSYEKDGTKEIS 197  
 PfPM1 RLKNYIKESLKFKTLTQKPHLGNAGDSVTLNDVANVMFYGEAQIGDNKKQKFAFIFDTGSANLWVPSAQCNITIGCKTKNLYDSSKSKTYEKDGTKEVMN 199  
 PfPM2 KLKNYIKESVNFNLGSLTKTNYLGSNDVIELVDFQNMFYGDAEVDNKKQKPFIFDTGSANLWVPSVKCTTAGCLTKHLVDSSKSKTYEKDGTKEVMN 200  
 PfHAP KLKNYIKESVKLFNKGLTKKSYLGSFNDVIELKDLANVLSFGAELGDNKKQKFNFLHTASSNVVPSIKCTSESCSKNHYDSSKSKTYEKDDTPVKLT 199

YGSGTVSGFFSKDLVTLGNLSLPYKFIETDITDDLEPIYSASEFDGILGLGWKDLSIGSIDPIVVELKNQNKIDNALFTFYLPVHDKHAGYLTIGGIEEK  
 210 220 230 240 250 260 270 280 mAb 2G4 \*\*\*

Pgal PM YGSGSIKGSFSKDLVTLGHLSPYKFIETDITDDLEPIYSSSPFDGIVGLGWKDLALGKTSPIVVELKNQNKIDHGLFTFYLPVLDKHAGYLTIGGIEDK 230  
 Pviv PM YGSGTVKGGFFSKDLVTLGHLSPYKFIETDITDDLEPIYSSVEFDGILGLGWKDLSIGSIDPIVVELKNQNKIDNALFTFYLPVHDVHAGYLTIGGIEEK 299  
 Pova PM YGSGSIKGGFFSKDIVTLGYSAPYKFEATDITDDLEPIYGNIEFDGILGLGWKDLSIGAVDPIIEMKNQNKIDHALFTFYLSVNDKESGYLTIGGIEDK 299  
 Pmal PM YGSGTVRGGFFSKDLVTLGYSAPYKFIETDITDDLEPIYTAAEFDGILGLGWKDLSIGSIDPIVVELKNQNKIDQALFTFYLPVHDKHSGYLTIGGIEEK 300  
 PfPM4 YGSGTVRGGFFSKDIVSLGDLSPYKFIETDITDDLEPIYSGSEFDGILGLGWKDLSIGSIDPIVVELKNQNKIDNALFTFYLPVHDHVGKYLIGGIESD 297  
 PfPM1 YVSGTVSGFFSKDIVTIANLSFPYKFIETDITNGFEPAYTLGQFDGIVGLGWKDLSIGSDPIVVELKNQNKIEQAVFTFYLPFDKHKGYLTIGGIEDR 299  
 PfPM2 YVSGTVSGFFSKDLVTVGNLSLPYKFIETDITNGFEPYTYASTFDGILGLGWKDLSIGSDPIVVELKNQNKIENALFTFYLPVHDKHTGFLTIGGIEER 300  
 PfHAP SKAGTISGIFSKDLVTIGKLSVPYKFIEMTEIVGFEPFYSESDVDGVFGLGWKDLSIGSIDPIVVELKTQNKIEQAVYSIYLPENKNGKGYLTIGGIEER 299

FYEGELTYEKLNDLHWQIDLDVHFGNTTMEKANAVDSTSTITAPTEFLNKFFKDLNVIKVPLFPFYVTTCDNKKLPTLEFSAANTYTTLEPEYYLDP  
 320 330 340 350 360 370 380 mAb 1H10 \*\*\*\*\*

Pgal PM FYEGEITYEKLNDLHWQIDLDITFGNDTFEKANAVDSTSTIVAPTEFVKKFFKDGIFKVPFLPVYVTECDNKSLEPTLEFHSNNKYTLEPKFYLD 330  
 Pviv PM FYEGNITYEKLNDLHWQIDLDVHFGKQTMKANVIVDSGTTITAPSEFLNKFFANLNVIKVPLFPFYVTTCDNKEMPTLEFKSANNTYTTLEPEYMN 399  
 Pova PM FYQGEITYEKLNDLHWQIDLDHMFNTTMTKANAVDSTSTITAPTTITTEFFKDKNVKVPFLFPFYITTCNDEMPTLFTSGSNTYTTLEPEYMDP 399  
 Pmal PM FYEGELTYEKLNDLHWQVDLDVNFGKTSMEKANVIVDSGTTITAPTSFINKFFKDLNVIKVPLFPFYITTCNNKDMPTLEFKSANNTYTTLEPEYMEP 400  
 PfPM4 FYEGPLTYEKLNDLHWQIDLDHFGKYMKANAVDSTSTITAPTSFINKFFRDMNVKVPFLPLFYVTTCDNDLPTLEFHSRNNKYTLEPEFYMDP 397  
 PfPM1 FYEGOLTYEKLNDLHWQVDLDLHFGNLTVEKATAIVDSGTTITAPTEFLNKFFEGLDVVKVPFLPLFYITTCNNPKLPTLEFRSATNVYTTLEPEYLOQ 399  
 PfPM2 FYEGPLTYEKLNDLHWQITLDAHVGNIMLEKANVIVDSGTTITAPVDFLNKMLQNLVVKVPFLFPFYVTTLNNKSLPTFEFTSENGKYTLEPEYLOQ 400  
 PfHAP FFDGPLNYEKLNDLHWQVDLDVHFGNVSSKANVILDSATSVITVPTTEFFNQFVESASVFKVPFLSLYVTTGNTKLPTELYRSPNKVYTTLEPKQYLEP 399

LEDIDDTLCMLYILPVDIDKNTFILGDPFMRKYFTVFDYDNESVGFVAVAKN--  
 \*\*\*\*\* 410 420 430 440 450

Pgal PM LEEVDES LCMVYIMP GDIDKQT 352  
 Pviv PM ILEVDDTLCHITMLPVDIDSNTFILGDPFMRKYFTVFDYDKESVGFVAVAKN 450  
 Pova PM LFDIDETLCIVDIIPVDIDENTFILGAPFMRKYFSVFDYDNERYGFVAVAKN 450  
 Pmal PM LLDIDDTLCMLYILPVDIDKNTFILGDPFMRKYFTVFDYDKESIGFVAVAKN 451  
 PfPM4 LSDIDPALCMLYILPVDIDNTFILGDPFMRKYFTVFDYDKESVGFVAVAKNL 449  
 PfPM1 IFDFGISL CMLYIIPVDLNKNTFILGDPFMRKYFTVFDYDNHTVGFALAKKLL 452  
 PfPM2 IEDVGPGLCMLNIIGLDFPVPFTFILGDPFMRKYFTVFDYDNHNSVGFALAKKLL 453  
 PfHAP LENIF S L CMLNIIPVLDLEKNTFVYLDGDPFMRKYFTVYDYNHTVGFALAKNL 451
